# Supplementary material for: COI barcoding of plant bugs (Insecta: Hemiptera: Miridae)
Source: PubMed Central journal article supplement (PMC6284446; doi:10.7717/peerj.6070), 2018-12-04

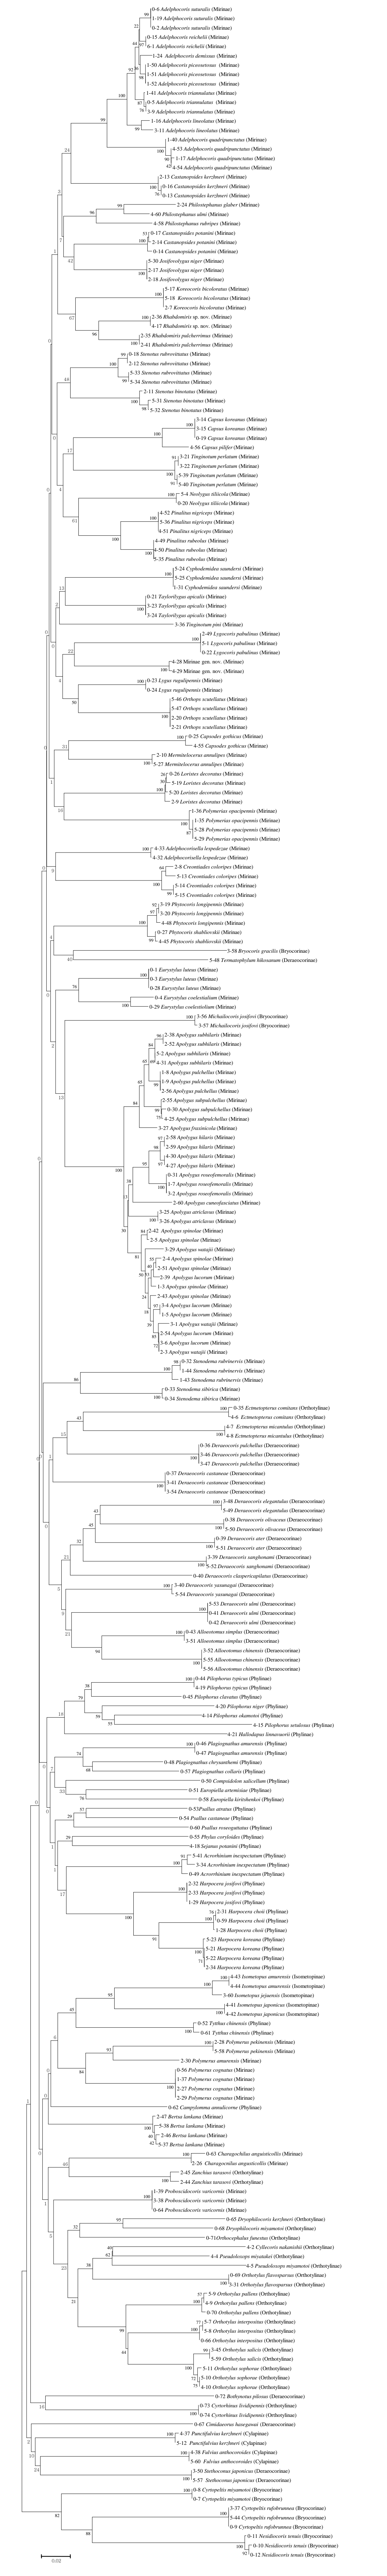

Supplement: peerj-06-6070-s003.pdf [file peerj-06-6070-s003.pdf]
